# Supplementary material for: Sex and Age Differences in Exposure to Secondhand Smoke at Home among Korean Adolescents: A Nationally Representative Survey
Source: MDPI journal article supplement (doi:10.3390/ijerph13020241), 2016-02-19
Supplement: s1 [file s1]

# Supplementary Materials: Sex and Age Differences in Exposure to Secondhand Smoke at Home among Korean Adolescents: A Nationally Representative Survey

Jun Hyun Hwang and Soon-Woo Park

**Table S1.** The original Korean version of core questionnaires.

| English Version                                                                                 | Korean Version                                                           |
|-------------------------------------------------------------------------------------------------|--------------------------------------------------------------------------|
| Q1. During the past 7 days, on how many days have people smoked in your home, in your presence? | Q1. 최근 7 일 동안, 학생의 집안에서 다른 사람(가족이나 손님 등)이 담배를 피울 때 그 근처에 같이 있는 적이 며칠입니까? |
| ① 0 day                                                                                         | ① 최근 7 일 동안 없다                                                           |
| ② 1 day                                                                                         | ② 주 1 일                                                                  |
| ③ 2 days                                                                                        | ③ 주 2 일                                                                  |
| ④ 3 days                                                                                        | ④ 주 3 일                                                                  |
| ⑤ 4 days                                                                                        | ⑤ 주 4 일                                                                  |
| ⑥ 5 days                                                                                        | ⑥ 주 5 일                                                                  |
| ⑦ 6 days                                                                                        | ⑦ 주 6 일                                                                  |
| ⑧ 7 days                                                                                        | ⑧ 매일                                                                     |
| Q2. Please indicate all the current smoker in your family                                       | Q2. 가족 중에서 현재 담배를 피우는 분은 모두 표시해 주십시오.                                    |
| ① None                                                                                          | ①없다                                                                      |
| ② Father                                                                                        | ② 아버지                                                                    |
| ③ Mother                                                                                        | ③ 어머니                                                                    |
| ④ Siblings                                                                                      | ④ 형제 자매                                                                  |
| ⑤ Grandparents                                                                                  | ⑤ 할아버지 할머니                                                               |
| ⑥ Others                                                                                        | ⑥ 기타                                                                     |
| ⑦ Don't Know                                                                                    | ⑦ 잘 모른다                                                                  |
| Q3. Do any of your closest friends smoke tobacco?                                               | Q3. 친한 친구 중에 담배를 피우는 친구가 있습니까?                                           |
| ① None of them                                                                                  | ① 아무도 안 피운다                                                              |
| ② Some of them                                                                                  | ② 몇 명은 담배를 피운다                                                           |
| ③ Most of them                                                                                  | ③ 대부분은 담배를 피운다                                                           |
| ④ All of them                                                                                   | ④ 모두 담배를 피운다                                                             |

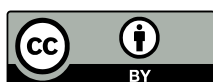

© 2016 by the authors; licensee MDPI, Basel, Switzerland. This article is an open access article distributed under the terms and conditions of the Creative Commons by Attribution (CC-BY) license (<http://creativecommons.org/licenses/by/4.0/>).
